# Supplementary material for: Minimally Invasive Surgery in Emergency Surgery: A WSES Survey
Source: Research Square preprint supplement (doi:10.21203/rs.3.rs-1116437/v1), 2021-12-01
Supplement: Supplementary file [file e884601f57ece809ae698aa6.pdf]

# Minimally Invasive Surgery in Emergency (MISE)

Dear Colleague,

the aim of the current online survey by the World Society of Emergency Surgery ([www.wses.org.uk](http://www.wses.org.uk)) is to explore the use of Minimally Invasive Surgery in Primary Surgical Emergencies and in Secondary Surgical Emergencies, which are emergency surgical conditions after elective Minimally Invasive Surgery. Please take a few minutes to fill the questionnaire.

The results will be available on the World Journal of Emergency Surgery website ([wjes.biomedcentral.com](http://wjes.biomedcentral.com)); moreover, a review focused on this topic will be published. If you wish to collaborate for further activities, please leave your e-mail in the dedicated box.

Please, also feel free share this questionnaire with as many colleagues as possible!

Thank you very much for your time!

---

**\*Required**

1. Email \*

---

To share the Questionnaire with your colleagues via social apps, please scan the QR code and forward it to your contacts

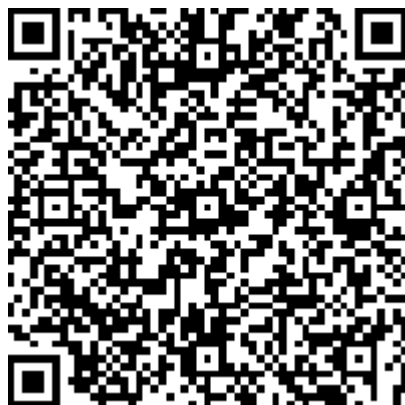

2. Please indicate your affiliation \*

---

## PERSONAL CHARACTERISTICS:

The aim of this section is to characterize the profile of the responder surgeon in order to better investigate the results of the present survey and describe the use of MIS in Emergency among surgeons with different subspecializations.

3. Please state your age? (NUMBER) \*

---

4. Gender (M/F) \*

*Mark only one oval.*

- ☐ Male  
☐ Female  
☐ Prefer not to say

5. How long is your professional experience as a surgeon? \*

*Mark only one oval.*

- ☐ 0-5 years  
☐ 6-15 years  
☐ >15 years  
☐ Resident / Registrar

6. Please rate the area of expertise for each subspecialty. \*

Mark only one oval per row.

|                                      | 0 -<br>none           | 1                     | 2                     | 3                     | 4                     | 5 - high              |
|--------------------------------------|-----------------------|-----------------------|-----------------------|-----------------------|-----------------------|-----------------------|
| General surgery                      | <input type="radio"/> | <input type="radio"/> | <input type="radio"/> | <input type="radio"/> | <input type="radio"/> | <input type="radio"/> |
| Emergency surgery and Trauma surgery | <input type="radio"/> | <input type="radio"/> | <input type="radio"/> | <input type="radio"/> | <input type="radio"/> | <input type="radio"/> |
| Colorectal surgery                   | <input type="radio"/> | <input type="radio"/> | <input type="radio"/> | <input type="radio"/> | <input type="radio"/> | <input type="radio"/> |
| Upper GI surgery                     | <input type="radio"/> | <input type="radio"/> | <input type="radio"/> | <input type="radio"/> | <input type="radio"/> | <input type="radio"/> |
| HPB surgery                          | <input type="radio"/> | <input type="radio"/> | <input type="radio"/> | <input type="radio"/> | <input type="radio"/> | <input type="radio"/> |
| Endocrine surgery                    | <input type="radio"/> | <input type="radio"/> | <input type="radio"/> | <input type="radio"/> | <input type="radio"/> | <input type="radio"/> |
| Bariatric surgery                    | <input type="radio"/> | <input type="radio"/> | <input type="radio"/> | <input type="radio"/> | <input type="radio"/> | <input type="radio"/> |

7. Do you usually perform MIS (laparoscopy or robotic) for major elective abdominal surgery ? \*

Mark only one oval per row.

|             | never                 | less than 25% of cases | 25-50% of cases       | more than 50% of cases |
|-------------|-----------------------|------------------------|-----------------------|------------------------|
| Laparoscopy | <input type="radio"/> | <input type="radio"/>  | <input type="radio"/> | <input type="radio"/>  |
| Robotic     | <input type="radio"/> | <input type="radio"/>  | <input type="radio"/> | <input type="radio"/>  |

8. Do you usually perform MIS (laparoscopy or robotic) for primary surgical emergencies? \*

Mark only one oval per row.

|             | Never                 | Less than 25% of cases | 25-50% of cases       | More than 50% of cases |
|-------------|-----------------------|------------------------|-----------------------|------------------------|
| Laparoscopy | <input type="radio"/> | <input type="radio"/>  | <input type="radio"/> | <input type="radio"/>  |
| Robotic     | <input type="radio"/> | <input type="radio"/>  | <input type="radio"/> | <input type="radio"/>  |

9. Do you usually perform MIS (laparoscopy or robotic) for secondary surgical emergencies (complications of elective surgery)? \*

Mark only one oval per row.

|             | Never                 | Less than 25% of cases | 25-50% of cases       | More than 50% of cases |
|-------------|-----------------------|------------------------|-----------------------|------------------------|
| Laparoscopy | <input type="radio"/> | <input type="radio"/>  | <input type="radio"/> | <input type="radio"/>  |
| Robotic     | <input type="radio"/> | <input type="radio"/>  | <input type="radio"/> | <input type="radio"/>  |

## HOSPITAL CHARACTERISTICS:

The aim of this section is to provide information regarding the characteristics of the different institutions in which the responder of the survey practise.

10. In which country do you work? \*

---

11. Is your hospital a public or a private institution? \*

Mark only one oval.

- ☐ Public Hospital
- ☐ Private Hospital

12. Is your hospital a first-, second- or third-level institution? \*

*Mark only one oval.*

- ☐ First-level (rural/community hospital)
- ☐ Second-level (regional/general hospital)
- ☐ Third-level (academic/referral hospital)

13. Is there an Emergency Department at your hospital? \*

*Mark only one oval.*

- ☐ Yes
- ☐ No

14. Is there a dedicated Emergency Surgery / Acute Care Surgery Unit at your hospital? \*

*Mark only one oval.*

- ☐ Yes
- ☐ No

15. Which proportion of your current practice is dedicated to emergency surgery? \*

*Tick all that apply.*

- ☐ 0%
- ☐ 1-25%
- ☐ 26-50%
- ☐ >50%

**INDICATION FOR  
THE USE OF MISE**

The aim of this section is to explore your confidence in managing primary and secondary surgical emergencies

16. Please rate the level of your personal confidence with MISE for the following primary emergencies \*

Mark only one oval per row.

[illegible]

- Mark only one oval per row.

[illegible]

- The diagram consists of a blue rounded rectangle on the left containing the text "LIMITATIONS IN THE USE OF MISE". A line connects this rectangle to a larger white rounded rectangle on the right, which contains the text: "The aim of this section is to explore the limits in approaching primary and secondary emergencies with MIS."

Please rate the relevance of the following items in limiting a MIS approach to primary and secondary emergencies. The emergency surgical procedures are divided into four groups.

- Mark only one oval per row.

[illegible]



## Occlusion due to peritoneal adhesions \*

Mark only one oval per row.

[illegible]

22. LIMITS in GROUP 3: Colon resection for Hinchey 3 and 4 Acute Diverticulitis \*

Mark only one oval per row.

[illegible]

23. LIMITS in GROUP 4: Dehiscence of intestinal anastomosis (included colorectal anastomosis), dehiscence of gastrointestinal anastomosis after partial gastrectomy, bile leak after cholecystectomy, bile leak after liver resection, postoperative haemoperitoneum, postoperative intestinal obstruction \*

*Mark only one oval per row.*

|                                                | 0 -<br>none           | 1                     | 2                     | 3                     | 4                     | 5 - high              |
|------------------------------------------------|-----------------------|-----------------------|-----------------------|-----------------------|-----------------------|-----------------------|
| Your own<br>surgical<br>skills                 | <input type="radio"/> | <input type="radio"/> | <input type="radio"/> | <input type="radio"/> | <input type="radio"/> | <input type="radio"/> |
| Nursing<br>skill                               | <input type="radio"/> | <input type="radio"/> | <input type="radio"/> | <input type="radio"/> | <input type="radio"/> | <input type="radio"/> |
| Night-time<br>operation                        | <input type="radio"/> | <input type="radio"/> | <input type="radio"/> | <input type="radio"/> | <input type="radio"/> | <input type="radio"/> |
| Technology<br>availability                     | <input type="radio"/> | <input type="radio"/> | <input type="radio"/> | <input type="radio"/> | <input type="radio"/> | <input type="radio"/> |
| Estimated<br>prolonged<br>surgical<br>duration | <input type="radio"/> | <input type="radio"/> | <input type="radio"/> | <input type="radio"/> | <input type="radio"/> | <input type="radio"/> |

### LIMITS in CLINICAL CONDITIONS

Please rate the relevance of the following items in limiting a MIS approach to primary and secondary emergencies. The emergency surgical procedures are divided into four groups.

## 24. LIMITS in GROUP 1: Appendicitis, Cholecystitis \*

Mark only one oval per row.

[illegible]

## Occlusion due to peritoneal adhesions \*

Mark only one oval per row.

[illegible]

26. LIMITS in GROUP 3: Colon resection for Hinchey 3 and 4 Acute Diverticulitis \*

Mark only one oval per row.

[illegible]

27. LIMITS in GROUP 4: Dehiscence of intestinal anastomosis (included colorectal anastomosis), Dehiscence of gastro intestinal anastomosis after partial gastric resection, Bile leak after cholecystectomy, Bile leak after liver resection, post operative Hemoperitoneum, Post operative occlusion \*

Mark only one oval per row.

|                                  | 0 -<br>none           | 1                     | 2                     | 3                     | 4                     | 5 - high              |
|----------------------------------|-----------------------|-----------------------|-----------------------|-----------------------|-----------------------|-----------------------|
| Shock<br>condition               | <input type="radio"/> | <input type="radio"/> | <input type="radio"/> | <input type="radio"/> | <input type="radio"/> | <input type="radio"/> |
| Age                              | <input type="radio"/> | <input type="radio"/> | <input type="radio"/> | <input type="radio"/> | <input type="radio"/> | <input type="radio"/> |
| ASA score                        | <input type="radio"/> | <input type="radio"/> | <input type="radio"/> | <input type="radio"/> | <input type="radio"/> | <input type="radio"/> |
| APACHE<br>score                  | <input type="radio"/> | <input type="radio"/> | <input type="radio"/> | <input type="radio"/> | <input type="radio"/> | <input type="radio"/> |
| PPossum                          | <input type="radio"/> | <input type="radio"/> | <input type="radio"/> | <input type="radio"/> | <input type="radio"/> | <input type="radio"/> |
| ACS<br>NSQIP<br>Surgical<br>Risk | <input type="radio"/> | <input type="radio"/> | <input type="radio"/> | <input type="radio"/> | <input type="radio"/> | <input type="radio"/> |
| Previous<br>abdominal<br>surgery | <input type="radio"/> | <input type="radio"/> | <input type="radio"/> | <input type="radio"/> | <input type="radio"/> | <input type="radio"/> |

### LIMITATION IN THE PROSECUTION OF MISE

The aim of this section is to explore the reasons of conversions from MIS to a more invasive approach in primary and secondary surgical emergencies.

### LIMITS to PROSECTUION

Please rate the relevance of the following items as reasons for conversion to laparotomy. The emergency surgical procedures are divided into four groups.

28. GROUP 1: Appendicitis, Cholecystitis \*

Mark only one oval per row.

[illegible]

29. GROUP 2: Perforation of Gastric and Duodenal Ulcer, Bowel Occlusion due to peritoneal adhesions \*

Mark only one oval per row.

[illegible]



30. GROUP 3: Colon resection for Hinchey 3 and 4 Acute Diverticulitis \*

Mark only one oval per row.

[illegible]

31. GROUP 4: Dehiscence of intestinal anastomosis (included colorectal anastomosis), Dehiscence of gastro intestinal anastomosis after partial gastric resection, Bile leak after cholecystectomy, Bile leak after liver resection, post operative Hemoperitoneum, Post operative occlusion \*

Mark only one oval per row.

|                                                           | 0 -<br>none           | 1                     | 2                     | 3                     | 4                     | 5 - high              |
|-----------------------------------------------------------|-----------------------|-----------------------|-----------------------|-----------------------|-----------------------|-----------------------|
| Duration of the surgical procedure                        | <input type="radio"/> | <input type="radio"/> | <input type="radio"/> | <input type="radio"/> | <input type="radio"/> | <input type="radio"/> |
| Bleeding                                                  | <input type="radio"/> | <input type="radio"/> | <input type="radio"/> | <input type="radio"/> | <input type="radio"/> | <input type="radio"/> |
| Unclear/suboptimal visualization of anatomical structures | <input type="radio"/> | <input type="radio"/> | <input type="radio"/> | <input type="radio"/> | <input type="radio"/> | <input type="radio"/> |
| Perforation                                               | <input type="radio"/> | <input type="radio"/> | <input type="radio"/> | <input type="radio"/> | <input type="radio"/> | <input type="radio"/> |
| Intraoperative clinical deterioration                     | <input type="radio"/> | <input type="radio"/> | <input type="radio"/> | <input type="radio"/> | <input type="radio"/> | <input type="radio"/> |

Perspective in  
MISE (optional)

Would do you like to share your opinion and/or suggestions about the application of MIS in emergency surgery?  
Please write your suggestions regarding research perspectives and/or your personal opinion.  
Thank you!

32. Primary Emergency (PE) - excluding trauma

\_\_\_\_\_

33. Intraoperative Surgical Emergency Maneuvers (ISEM)

\_\_\_\_\_

34. Secondary Emergency (SE): reintervention after elective minimally invasive surgery (EMIS)
- 

To share the Questionnaire with your colleagues via social apps, please scan the QR code and forward it to your contacts

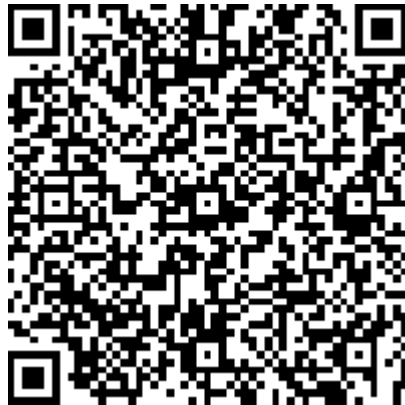

---

This content is neither created nor endorsed by Google.

Google Forms
